# Supplementary material
Source: publisher figshare collection journal article supplement (https://sage.figshare.com/ndownloader/files/18080165)
Supplement: Supplementary file 1 [file 18080165]

**Title – “[A review of current knowledge of Zamiaceae, with emphasis on *Zamia* from South America [Article title]”; Description – “Supplemental material, [1. Compilation of publications on the Zamiaceae family. 2. Table 1. General overview of studies with the genus *Zamia* from South America: conservation status of species, potential causes of population decline, and topics for future studies. 3. Table 2. Compilation of studies on seed dispersal and predation on different species of the Zamiaceae family. Interaction species, geographical region of study and references are provided. 4. Table 3. Compilation of studies (1870-2019) regarding antagonistic interactions involving Zamiaceae species from the New World. Table indicates the interacting agents (plant-animal species), behavior, geographical region of the study and references.], for [A review of current knowledge of Zamiaceae, with emphasis on *Zamia* from South America] by [Rosane Segalla, Francismeire Jane Telles, Fábio Pinheiro & Patrícia Morellato] in [Tropical Conservation Science]”.**

**Files in this Data Supplement:**

1. Compilation of publications on the Zamiaceae family.
2. Table 1. General overview of studies with the genus *Zamia* from South America: conservation status of species, potential causes of population decline, and topics for future studies.
3. Table 2. Compilation of studies on seed dispersal and predation on different species of the Zamiaceae family. Interaction species, geographical region of study and references are provided.
4. Table 3. Compilation of studies (1870-2019) regarding antagonistic interactions involving Zamiaceae species from the New World. Table indicates the interacting agents (plant-animal species), behavior, geographical region of the study and references.

**‘Supplemental material – already loaded to Figshare’:**

<https://figshare.com/s/b85d53f478f6eb91d843>
